# Supplementary material for: Enhanced removal of As(iii) by manganese-doped defective UiO-66 coupled peroxymonosulfate: multiple reactive oxygen species and system stability
Source: Royal Society of Chemistry journal article supplement (doi:10.1039/d4en00194j), 2024-01-01
Supplement: d4en00194j1.pdf [file d4en00194j1.pdf]

## **Supporting Information**

**Enhanced removal of As(III) by manganese doped defective UiO-66  
coupled peroxymonosulfate: Multiple reactive oxygen species and  
system stability**

## Characterization

The Zr-MOFs were characterized by Zeiss sigma500 scanning electron microscope (SEM) with an operating voltage of 10.0 kV, WD = 4.4 mm. The structure and composition of the Zr-MOFs were investigated by transmission electron microscope (TEM, FEI talos f200s 200 kV). The crystal phases of the Zr-MOFs were analyzed by X-ray diffractometer (XRD, D8 ADVANCE, Bruker, German). The X-ray photoelectron spectroscopy (XPS, Thermo ESCALAB 250Xi) and Fourier transform infrared spectroscopy (FTIR, Thermo Fisher Scientific, Nicolet iS 5) were employed to analyze the surface chemical properties of the Zr-MOFs before and after adsorption. The Brunauer-Emmett-Teller specific surface areas ( $S_{\text{BET}}$ ) and pore size distribution of the materials were analysed by Micromeritics 2460 analyser (degassing temperature: 423.15k, degassing time:12 h). The zero charge point of the adsorbent,  $\text{pH}_{\text{pzc}}$ , was obtained from a zeta potential meter (Malvern Zetasizer Nano ZS90). Electron spin resonance (ESR) test for radicals detection was performed by Bruker A300. The total arsenic concentration was determined by inductively coupled plasma mass spectrometry (ICP-MS, Agilent, 7900, USA) and inductively coupled plasma atomic emission spectroscopy (ICP-OES, AViO 500 PerkinElmer).

## Analytical methods

The adsorption kinetics of arsenic were determined by fitting the data to a model based on pseudo-first order (Eq. (S1)) and pseudo-second order (Eq. (S2)); adsorptive capacity was calculated by:

$$q_e = (C_0 - C_e) \times \frac{V}{W}$$

where  $q_e$  ( $\text{mg g}^{-1}$ ) is equilibrium adsorption capacity of arsenic on  $\text{Mn}_1\text{D}_{40}\text{UiO-66}$ ,  $V$  (L) presents the volume of arsenic solution used in the experiment,  $W$  (g) is the weight of the used  $\text{Mn}_1\text{D}_{40}\text{UiO-66}$ .

$$q_t = q_e(1 - e^{-k_1 t}) \quad (\text{S1})$$

$$q_t = q_e \left(1 - \frac{1}{1 + q_e k_2 t}\right) \quad (\text{S2})$$

where  $q_e$  ( $\text{mg g}^{-1}$ ) and  $q_t$  ( $\text{mg g}^{-1}$ ) are the adsorption capacity at equilibrium and at time  $t$  (min), respectively,  $k_1$  ( $\text{min}^{-1}$ ) is the pseudo-first-order adsorption rate constant,  $k_2$  ( $\text{g (mg} \cdot \text{min)}^{-1}$ ) is the pseudo-second-order adsorption rate constant.

Langmuir (Eq. (S3)) and Freundlich (Eq. (S4)) isotherm models were utilized to fit the adsorption isotherms based on Eq. (S3) and Eq. (S4):

$$q_e = \frac{q_{max} K_L C_e}{1 + K_L C_e} \quad (\text{S3})$$

$$q_e = K_F C_e^{\frac{1}{n}} \quad (\text{S4})$$

where  $C_e$  ( $\text{mg L}^{-1}$ ) is the equilibrated arsenic concentration within the solvent phase,  $q_e$  ( $\text{mg g}^{-1}$ ) is the amount of arsenic adsorbed by  $\text{Mn}_1\text{D}_{40}\text{UiO}-66$ ,  $q_{max}$  ( $\text{mg g}^{-1}$ ) is the maximum adsorption capacity,  $K_L$  is the Langmuir constant of adsorption,  $K_F$  and  $n$ , respectively, are the Freundlich model constants.

## Tables

**Table S1**  $S_{\text{BET}}$  and pore volume parameters of  $\text{Mn}_1\text{D}_{40}\text{UiO-66}$ .

| Samples                                 | $S_{\text{BET}}$ ( $\text{m}^2 \text{g}^{-1}$ ) | $V_{\text{p}}$ ( $\text{cm}^3 \text{g}^{-1}$ ) |
|-----------------------------------------|-------------------------------------------------|------------------------------------------------|
| UiO-66-0                                | 952.92                                          | 0.58                                           |
| $\text{D}_{40}\text{UiO-66}$            | 1306.09                                         | 0.71                                           |
| $\text{Mn}_1\text{D}_{40}\text{UiO-66}$ | 1273.13                                         | 0.68                                           |

**Table S2** Langmuir and Freundlich constants for arsenic adsorption by Mn<sub>1</sub>D<sub>40</sub>UiO-66.

| Items                                                     | T/°C | Langmuir model                      |                                |         | Freundlich model               |         |         |
|-----------------------------------------------------------|------|-------------------------------------|--------------------------------|---------|--------------------------------|---------|---------|
|                                                           |      | $q_{\max}$<br>(mg g <sup>-1</sup> ) | $K_L$<br>(L mg <sup>-1</sup> ) | $R^2$   | $K_F$<br>(mg g <sup>-1</sup> ) | n       | $R^2$   |
| As(III) / Mn <sub>1</sub> D <sub>40</sub> UiO-66 /<br>PMS | 25°C | 112.47429                           | 0.60005                        | 0.92597 | 41.60568                       | 2.63259 | 0.98191 |
| As(III) ) / Mn <sub>1</sub> D <sub>40</sub> UiO-66        | 25°C | 14.5589                             | 0.55433                        | 0.90227 | 5.99905                        | 3.44643 | 0.99464 |

**Table S3**  $k_{\text{obs}}$  with different pH, different concentrations of anions and different concentrations of humic acid.

| Variable condition | Reaction condition                  | $k_{\text{obs}}$ (min <sup>-1</sup> ) |
|--------------------|-------------------------------------|---------------------------------------|
| pH                 | pH = 3                              | 0.0527                                |
|                    | pH = 5                              | 0.0546                                |
|                    | pH = 7                              | 0.0563                                |
|                    | pH = 9                              | 0.0695                                |
|                    | pH = 11                             | 0.140                                 |
| Anions             | 5 mM SO <sub>4</sub> <sup>2-</sup>  | 0.0178                                |
|                    | 10 mM SO <sub>4</sub> <sup>2-</sup> | 0.0174                                |
|                    | 5 mM Cl <sup>-</sup>                | 0.0240                                |
|                    | 10 mM Cl <sup>-</sup>               | 0.0221                                |
|                    | 5 mM NO <sub>3</sub> <sup>-</sup>   | 0.0365                                |
|                    | 10 mM NO <sub>3</sub> <sup>-</sup>  | 0.0357                                |
|                    | 5 mM CO <sub>3</sub> <sup>2-</sup>  | 0.0033                                |
|                    | 10 mM CO <sub>3</sub> <sup>2-</sup> | 0.0035                                |
| HA                 | HA = 0 mg L <sup>-1</sup>           | 0.0752                                |
|                    | HA = 25 mg L <sup>-1</sup>          | 0.0635                                |
|                    | HA = 50 mg L <sup>-1</sup>          | 0.0483                                |
|                    | HA = 100 mg L <sup>-1</sup>         | 0.0491                                |

**Table S4** Results of shell-by-shell fitting from EXAFS data.

| Sample                                  | Atomic path | <sup>a</sup> CN | <sup>b</sup> R(Å) | <sup>c</sup> σ <sup>2</sup> (Å) | <sup>e</sup> R-factor |
|-----------------------------------------|-------------|-----------------|-------------------|---------------------------------|-----------------------|
| Mn <sub>1</sub> D <sub>40</sub> UiO-66- | As-O        | 4               | 1.79              | 0.001                           | 0.016                 |
| As                                      | As-Zr       | 1.5             | 3.50              | 0.013                           |                       |

<sup>a</sup>CN: coordination number;  $\sigma^2$ : Debye-Waller factor; <sup>b</sup>R: interatomic distance; <sup>e</sup>R-factor: goodness of fitting

**Table S5** Characteristics of the natural water samples.

| Items                                               | Value   |
|-----------------------------------------------------|---------|
| TOC (mg L <sup>-1</sup> )                           | 2.07    |
| TC (mg L <sup>-1</sup> )                            | 2.07    |
| pH                                                  | 3.22    |
| Cd (mg L <sup>-1</sup> )                            | 0.151   |
| Mn (mg L <sup>-1</sup> )                            | 10.846  |
| Fe ((mg L <sup>-1</sup> )                           | 0.141   |
| Co (mg L <sup>-1</sup> )                            | 0.050   |
| Ni (mg L <sup>-1</sup> )                            | 0.068   |
| Cu (mg L <sup>-1</sup> )                            | 0.116   |
| Zn (mg L <sup>-1</sup> )                            | 42.000  |
| SO <sub>4</sub> <sup>2-</sup> (mg L <sup>-1</sup> ) | 1472.84 |
| Cl <sup>-</sup> (mg L <sup>-1</sup> )               | 7.6905  |
| NO <sub>3</sub> <sup>-</sup> (mg L <sup>-1</sup> )  | —       |
| CO <sub>3</sub> <sup>2-</sup> (mg L <sup>-1</sup> ) | 17.135  |



## Figures

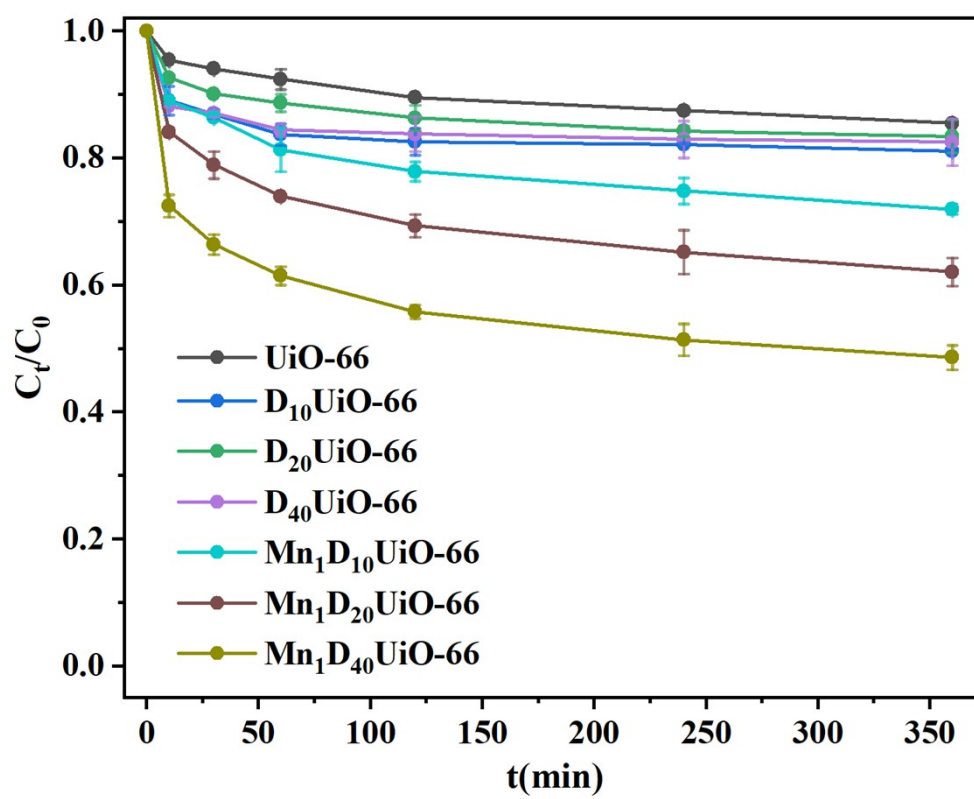

**Fig. S1.** As(III) removal efficiency by  $\text{Mn}_x\text{D}_n\text{UiO-66}$ ,  $C_{\text{catalyst}} = 0.2 \text{ g L}^{-1}$ ,  $C_{0(\text{As})} = 1 \text{ mg L}^{-1}$ .

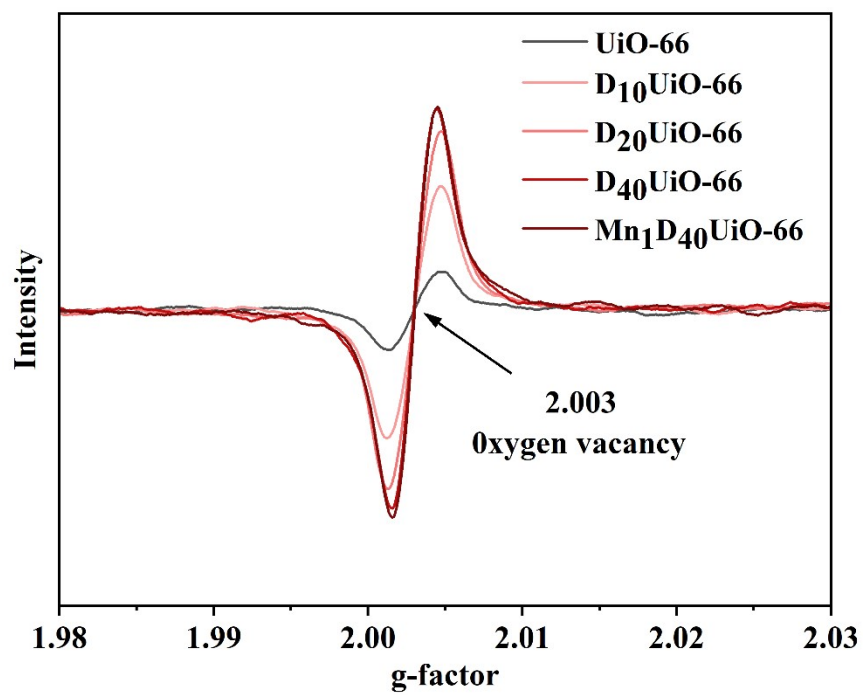

**Fig. S2.** ESR spectra of D<sub>n</sub>UiO-66 samples and Mn<sub>1</sub>D<sub>40</sub>UiO-66.

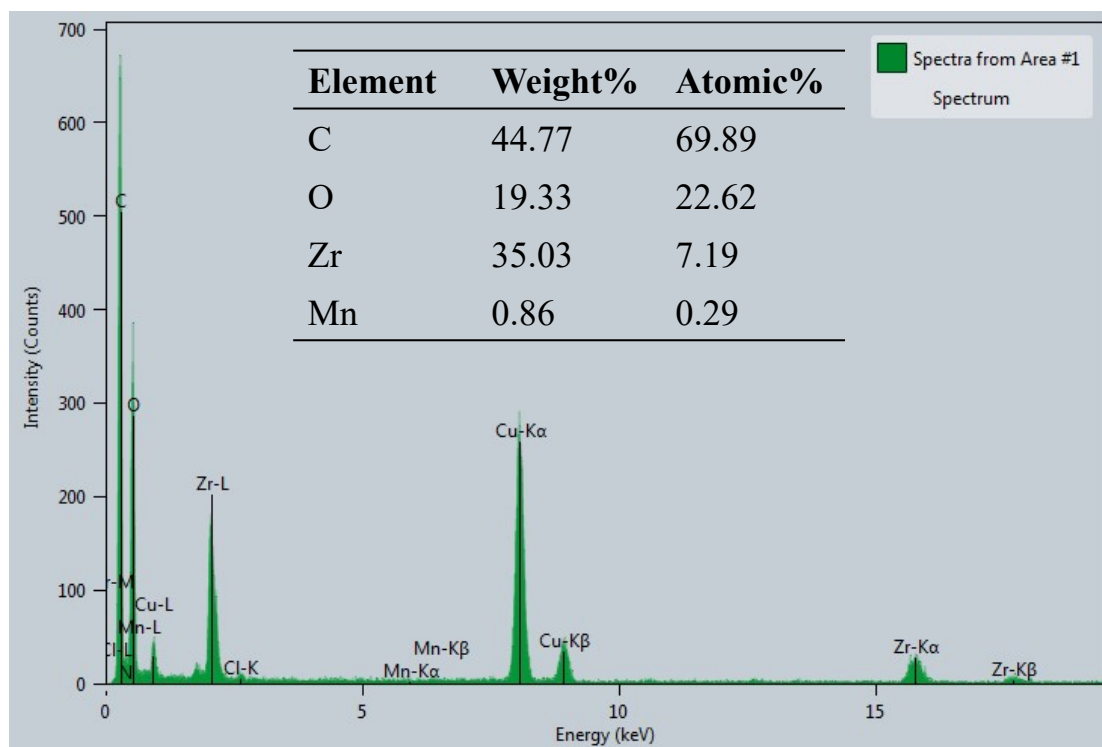

**Fig. S3.** EDS spectrum of Mn<sub>1</sub>D<sub>40</sub>UiO-66.

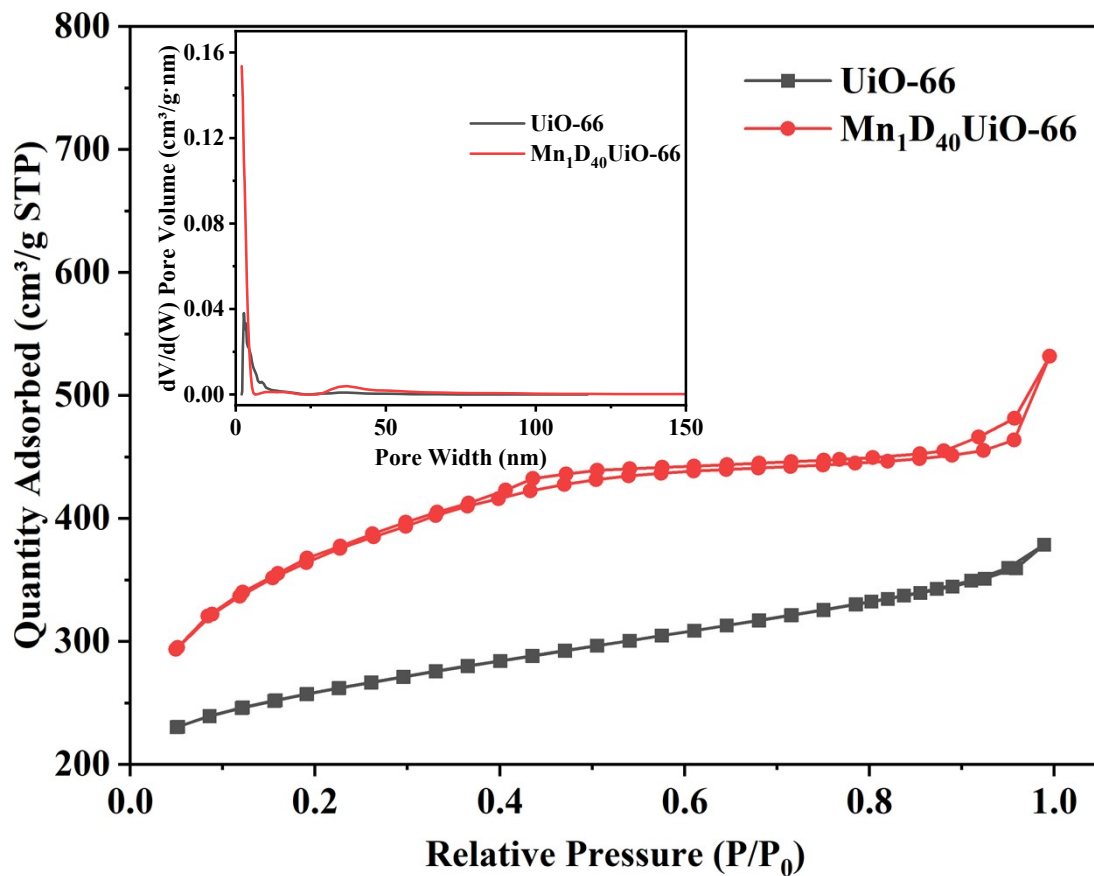

Fig. S4. The N<sub>2</sub> adsorption-desorption isotherms of Mn<sub>1</sub>D<sub>40</sub>UiO-66.

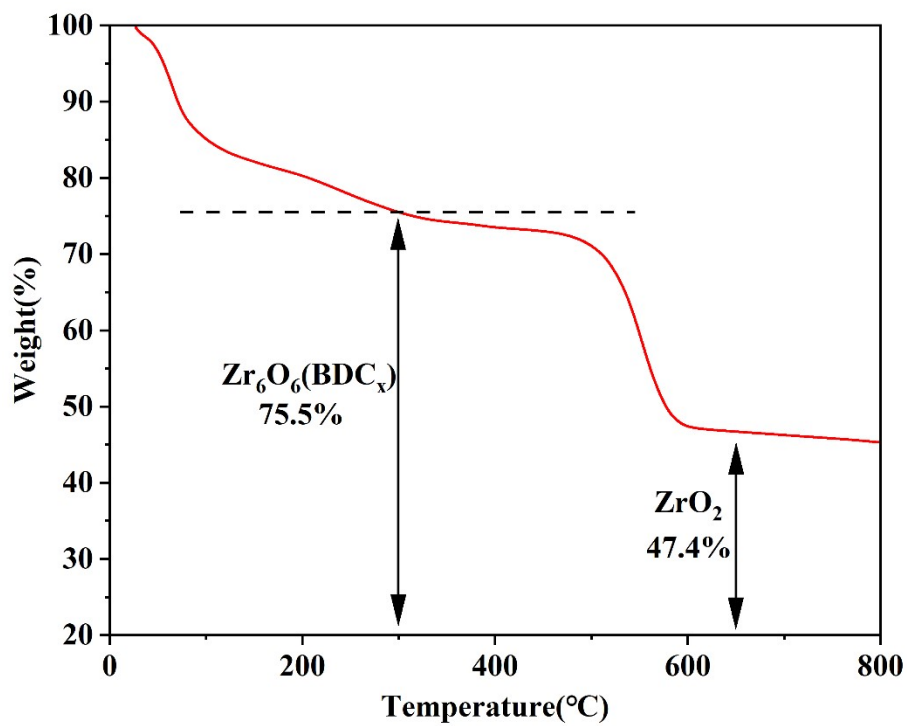

Fig.S5. TGA analysis of Mn<sub>1</sub>D<sub>40</sub>UiO-66.

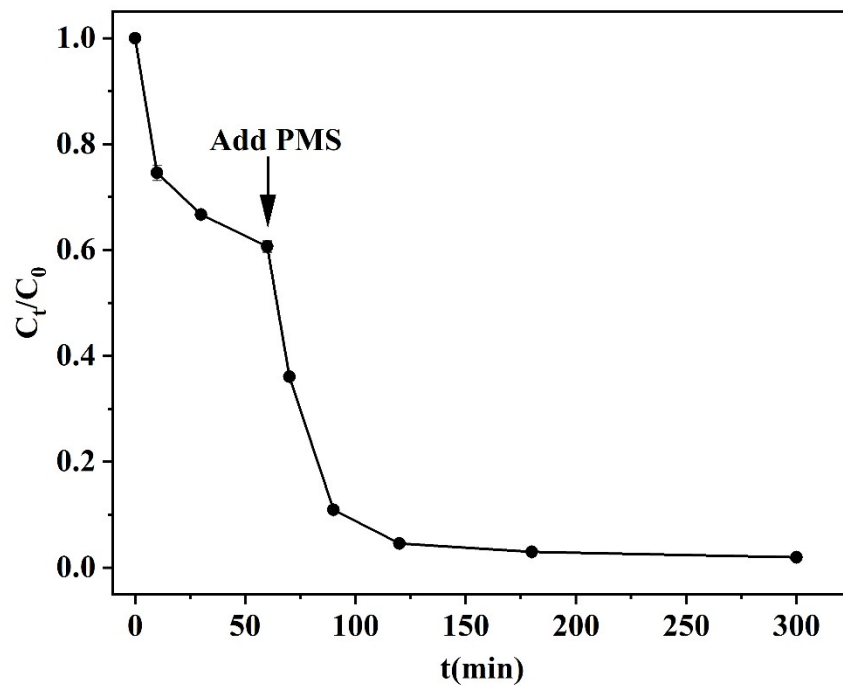

**Fig. S6.** Effect of adding PMS midway,  $Mn_1D_{40}UiO-66 = 0.2 \text{ g L}^{-1}$ .

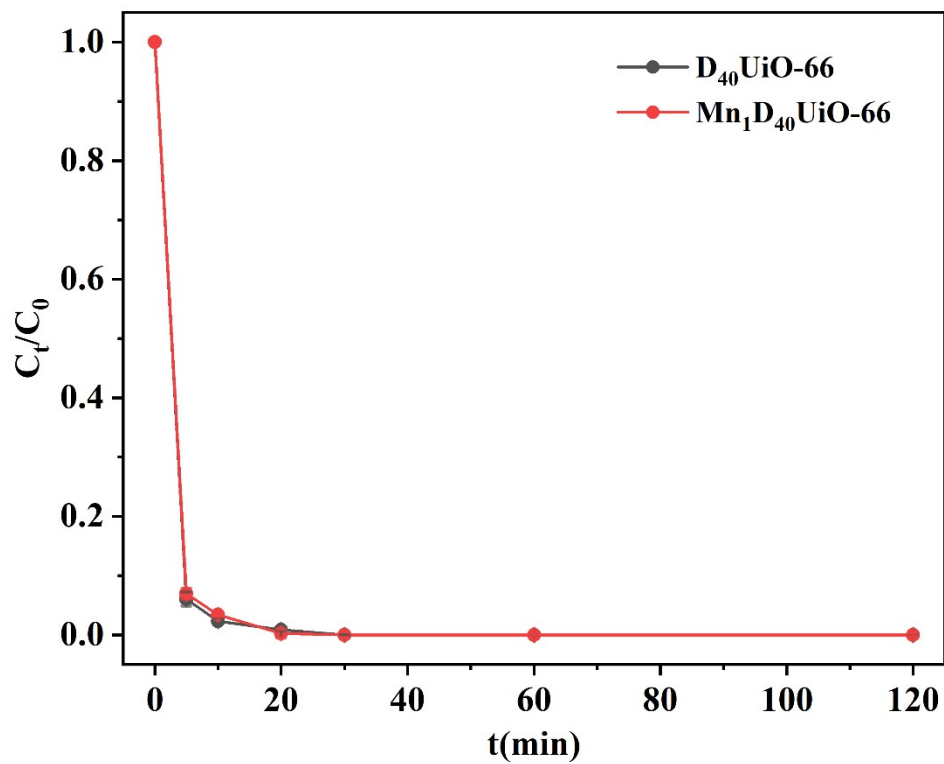

**Fig. S7.** Adsorption kinetics of As(V) by  $Mn_1D_{40}UiO-66$  and  $D_{40}UiO-66$ ,  $C_{catalyst} = 0.2$   $g L^{-1}$ ,  $C_{0(As)} = 1.1$   $mg L^{-1}$ .

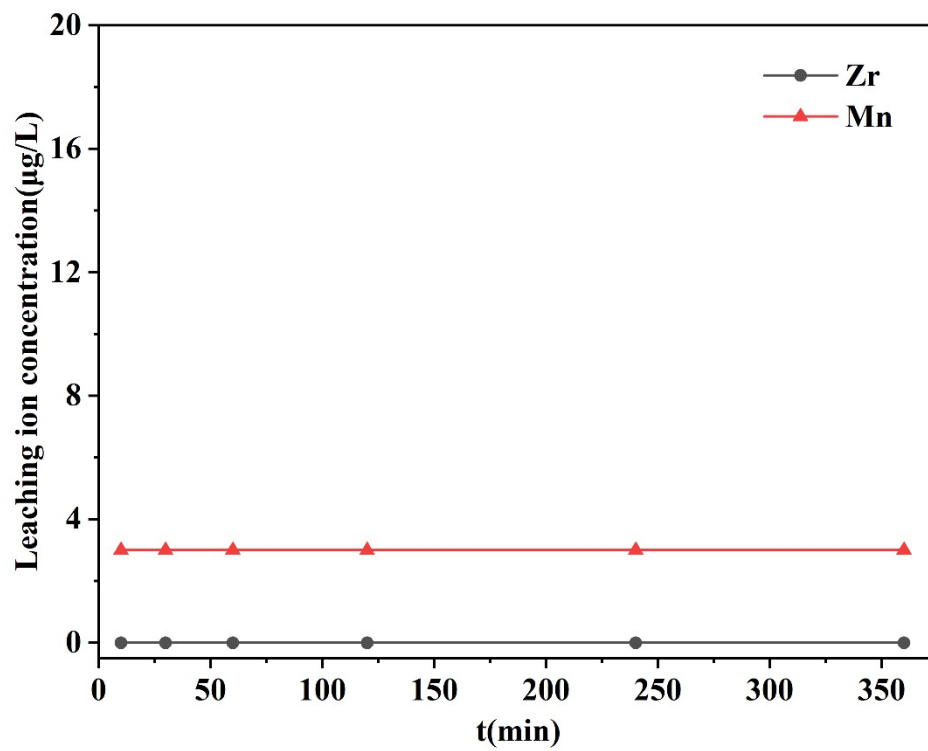

**Fig. S8.** Leaching of Zr and Mn during reactions in  $\text{Mn}_1\text{D}_{40}\text{UiO-66}$  / PMS system.



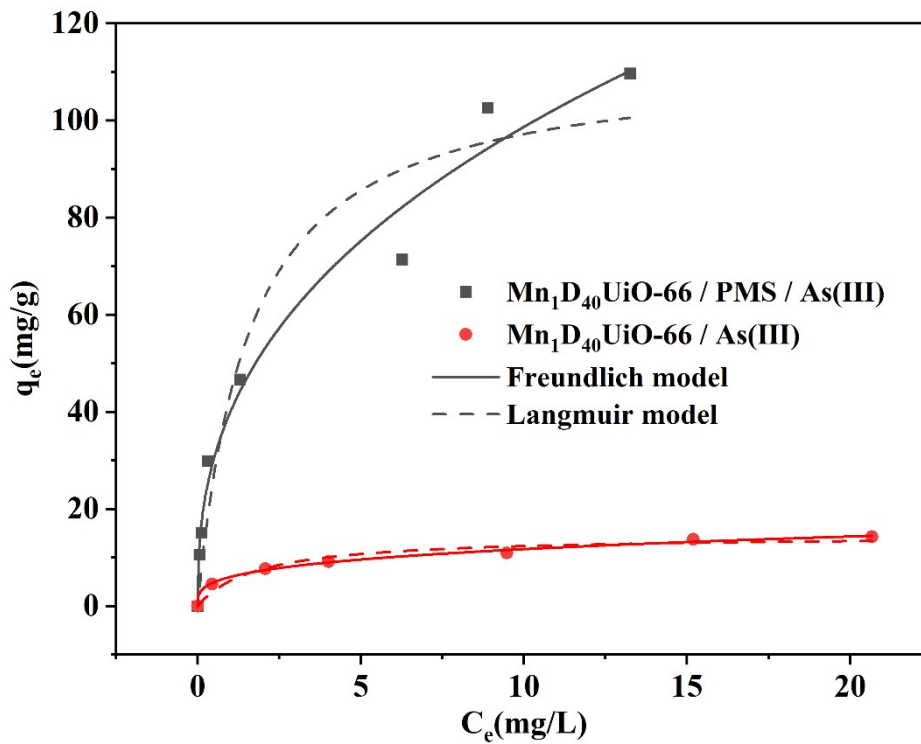

Fig. S9. Adsorption isotherms of As(III) by  $Mn_1D_{40}UiO-66$  with or without PMS.

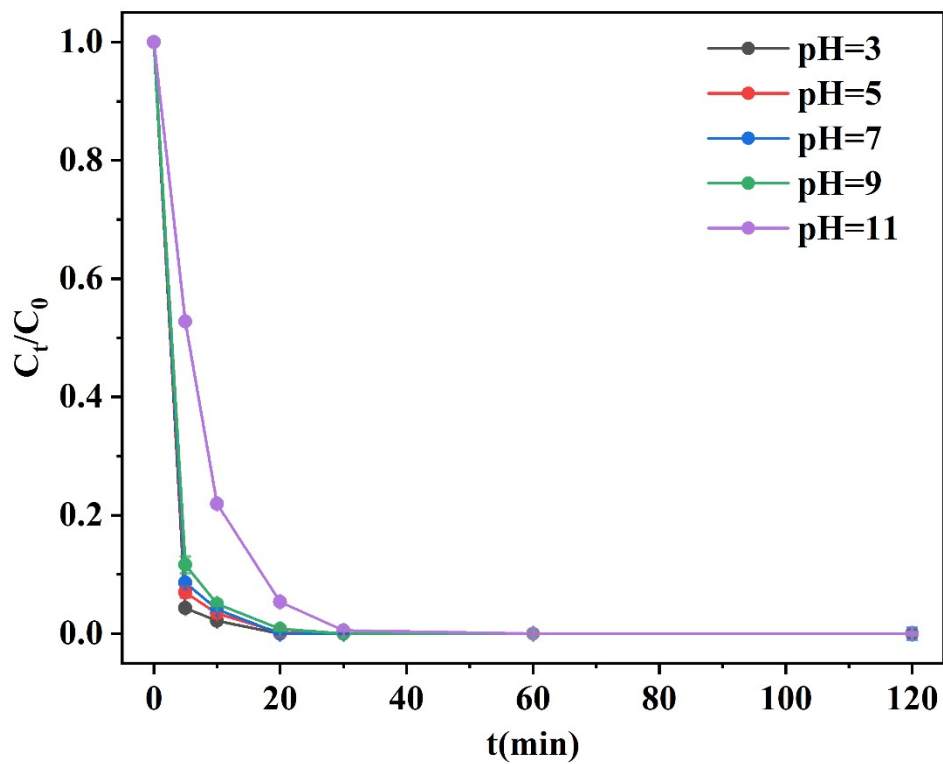

**Fig. S10.** Adsorption kinetics of As(V) by  $Mn_1D_{40}UiO-66$ .  $Mn_1D_{40}UiO-66 = 0.2 \text{ g L}^{-1}$ ,  $C_{0(As)} = 1.1 \text{ mg L}^{-1}$ .

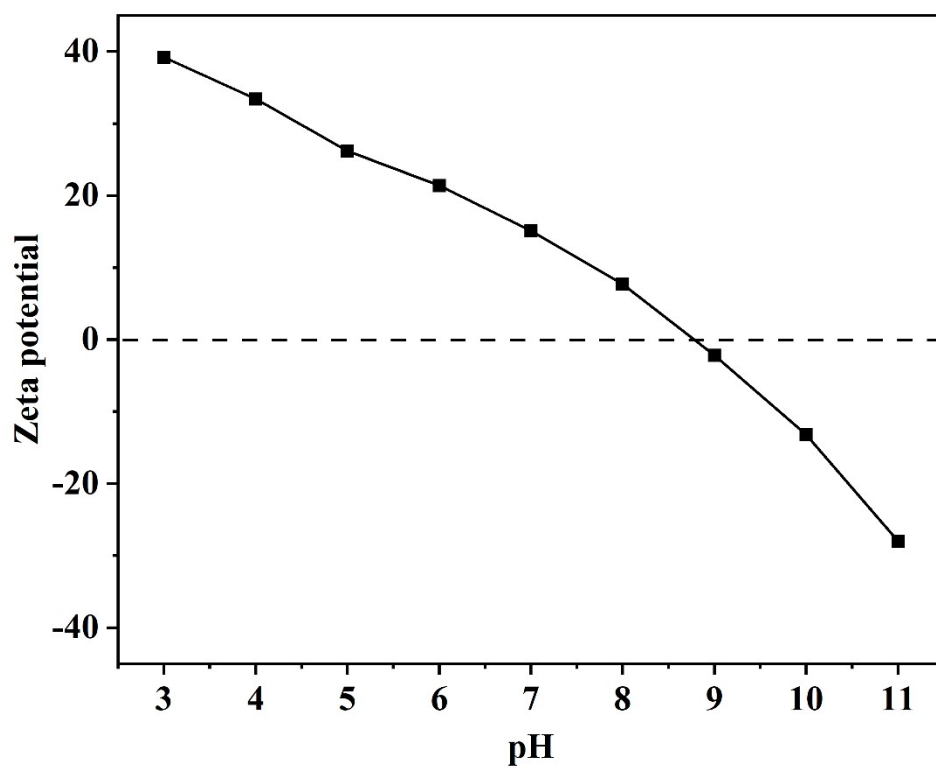

**Fig. S11.** Zeta potentials of  $\text{Mn}_1\text{D}_{40}\text{UiO-66}$ .

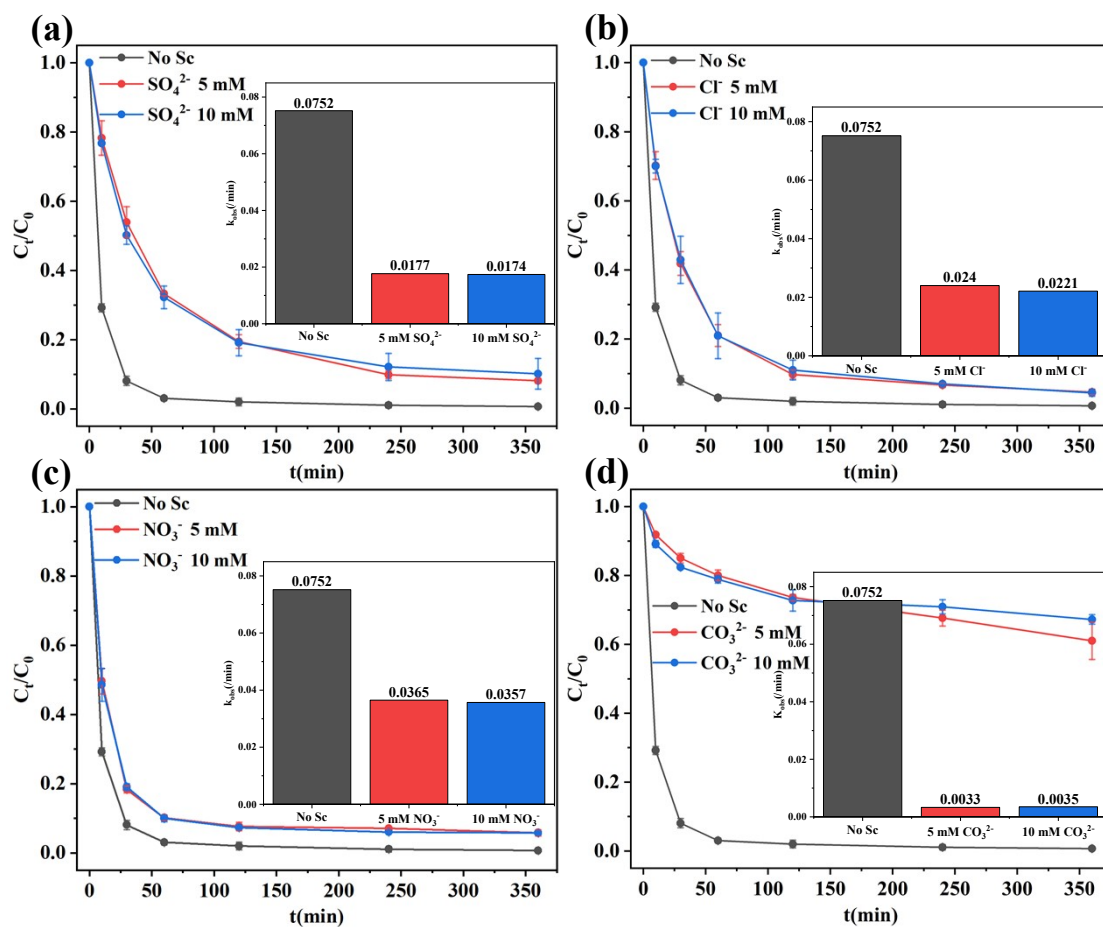

**Fig. S12.** The effect of solution anions on As(III) removal,  $Mn_1D_{40}UiO-66 = 0.2 \text{ g L}^{-1}$ ,  $C_{PMS} = 0.1 \text{ mM}$ ,  $C_{0(As)} = 1.1 \text{ mg L}^{-1}$ .

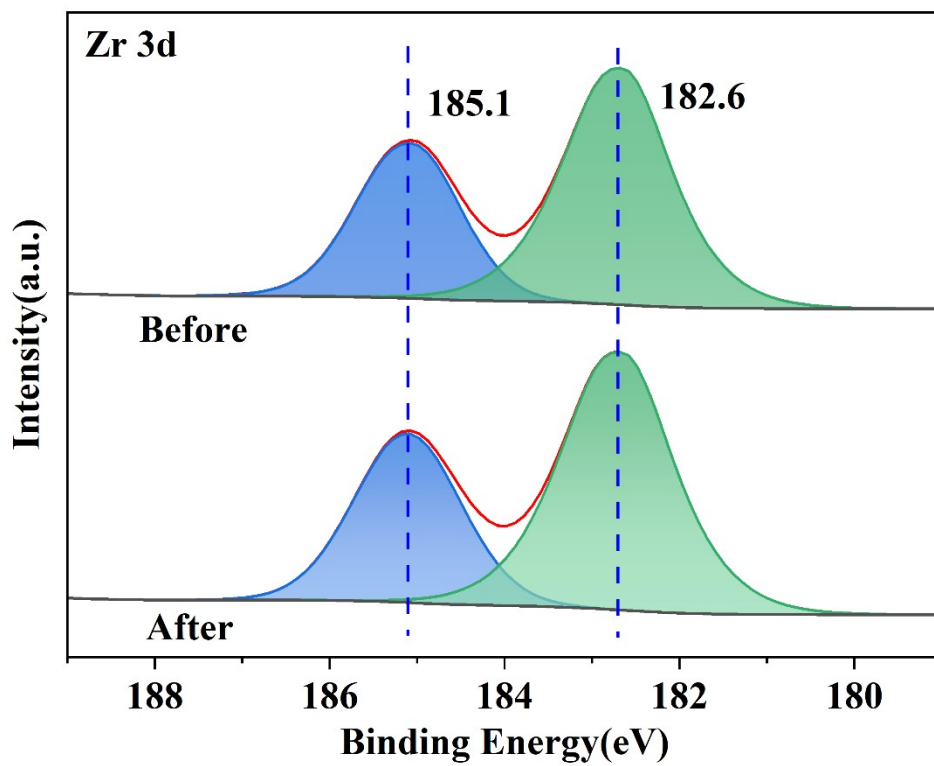

Fig. S13. Zr 3d XPS spectra.

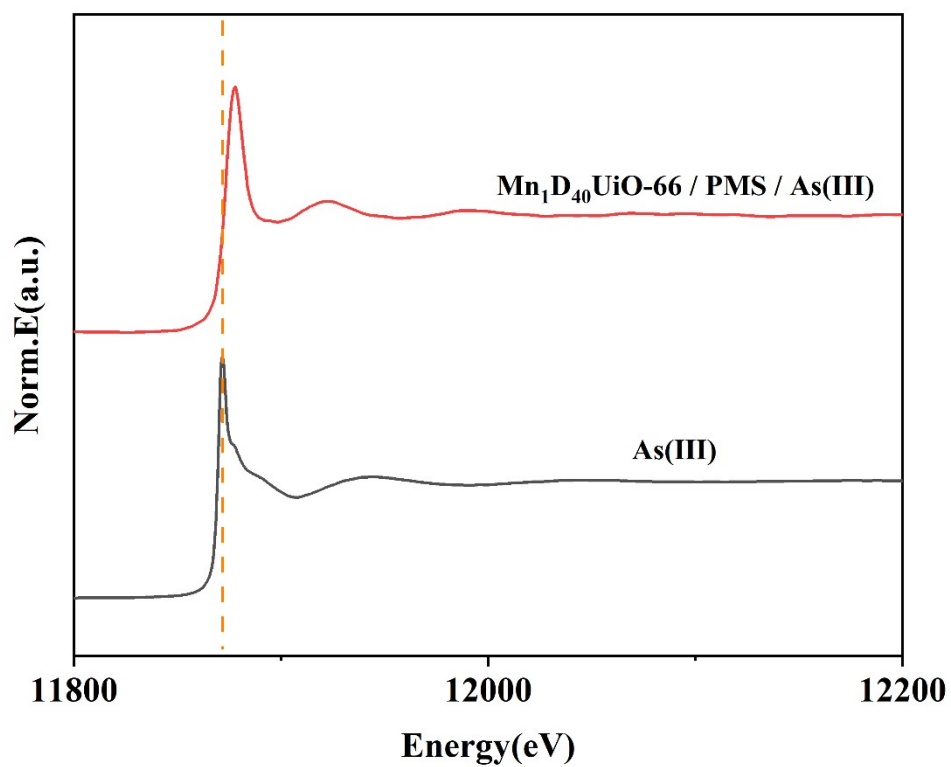

**Fig. S14** Normalized As K-edge EXAFS spectra of As<sub>2</sub>O<sub>3</sub> and Mn<sub>1</sub>D<sub>40</sub>UiO-66 after adsorption.

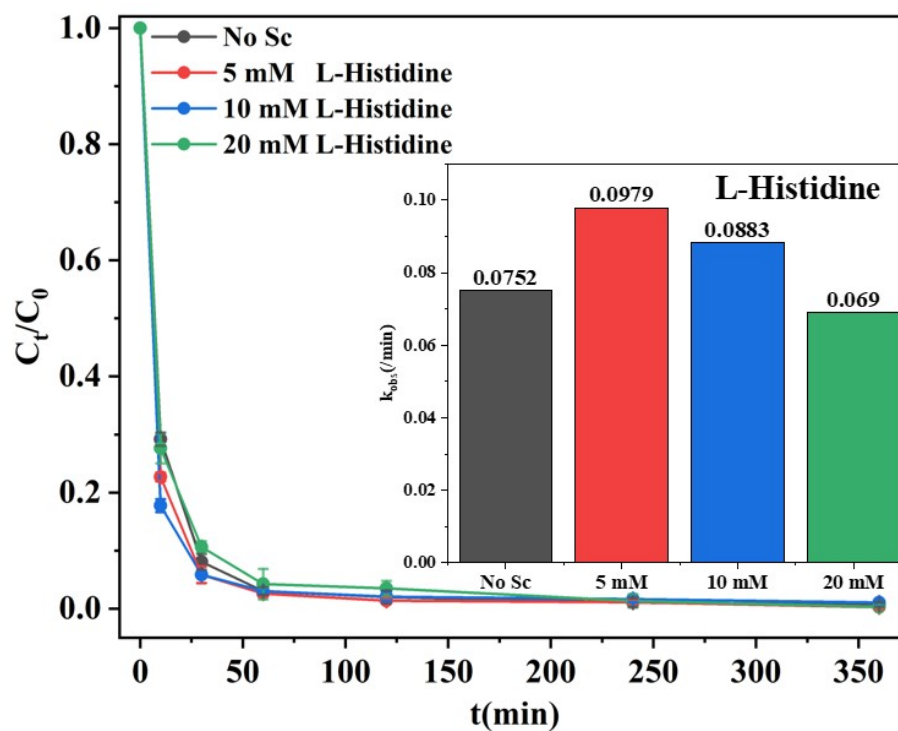

**Fig. S15.** Adsorption kinetics of As(III) with L-Histidine,  $Mn_1D_{40}UiO-66 = 0.2 \text{ g L}^{-1}$ ,  $C_{PMS} = 0.1 \text{ mM}$ ,  $C_{0(As)} = 1.1 \text{ mg L}^{-1}$ .

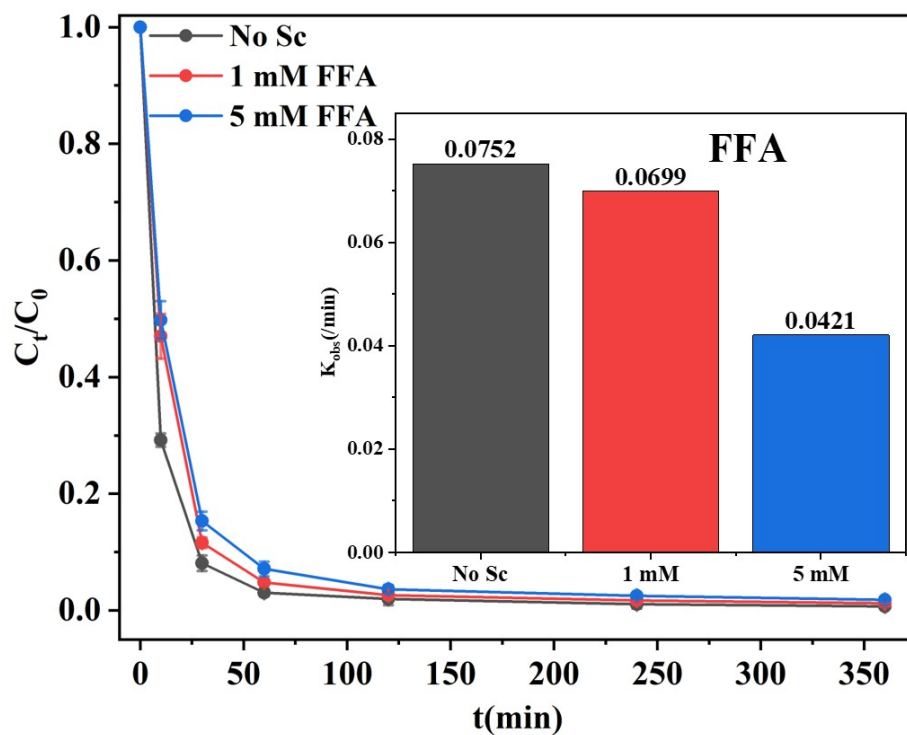

**Fig. S16.** Adsorption kinetics of As(III) with FFA,  $Mn_1D_{40}UiO-66 = 0.2 \text{ g L}^{-1}$ ,  $C_{PMS} = 0.1 \text{ mM}$ ,  $C_{0(As)} = 1.1 \text{ mg L}^{-1}$ .



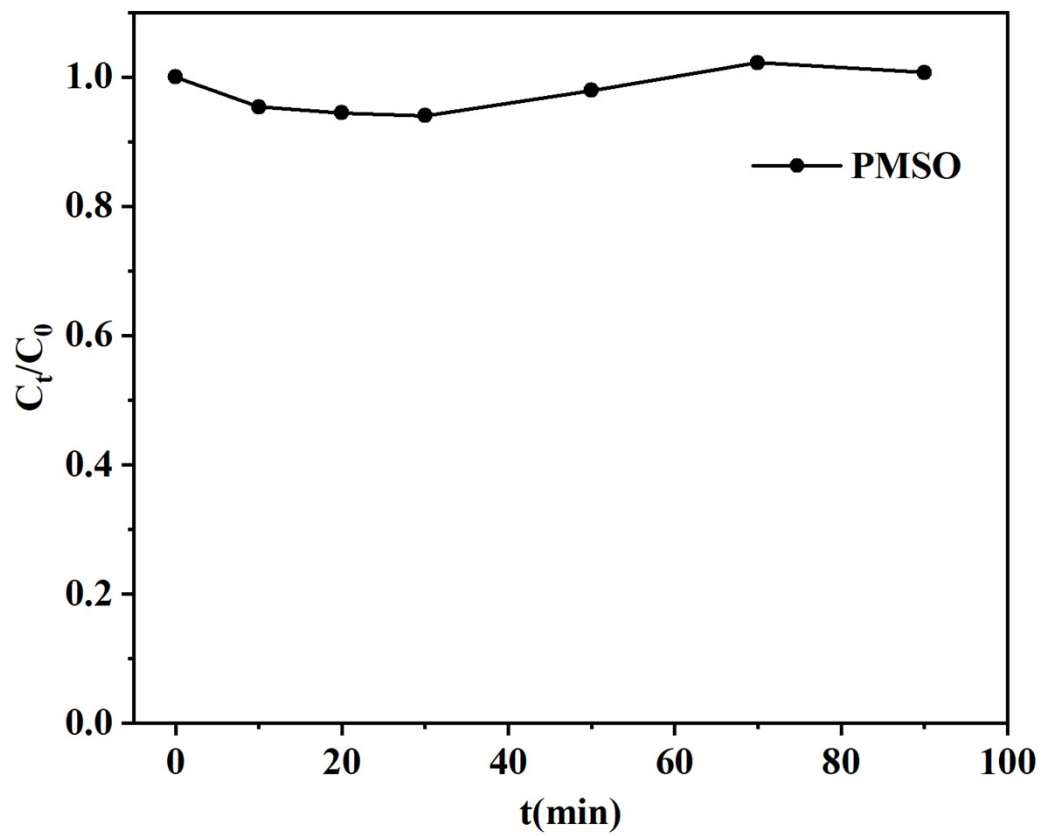

Fig. S17. Variation in the concentration of PMSO.  $C_{\text{PMSO}} = 10 \mu\text{M}$ .

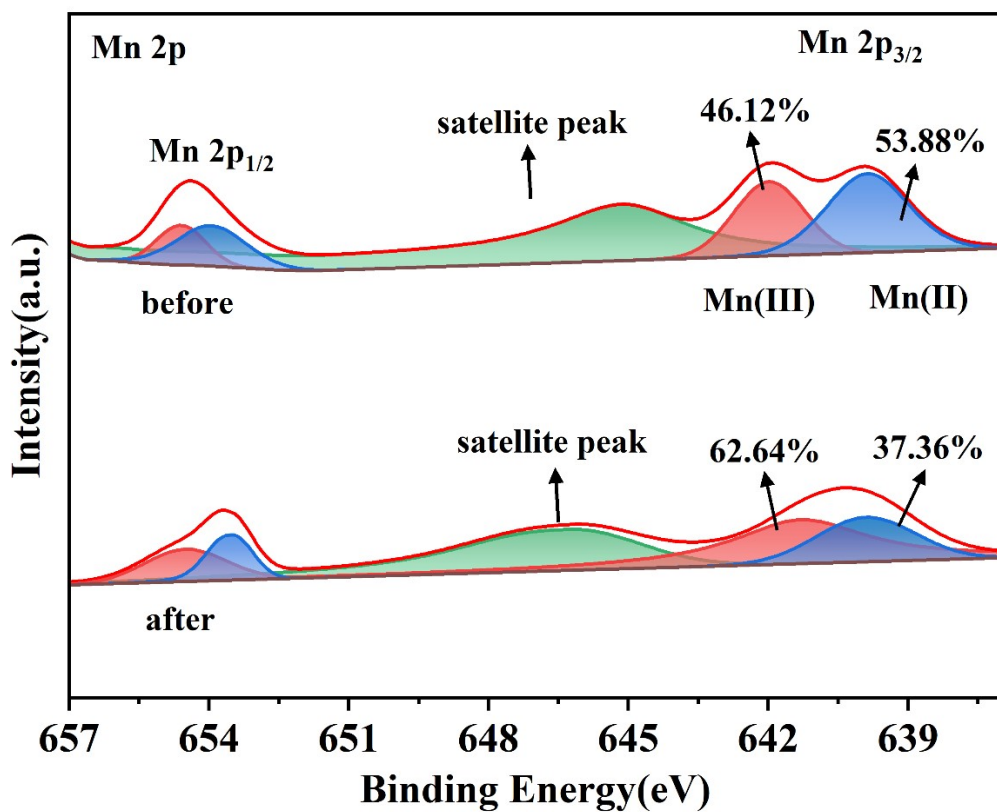

Fig. S18. Mn 2p XPS spectra.

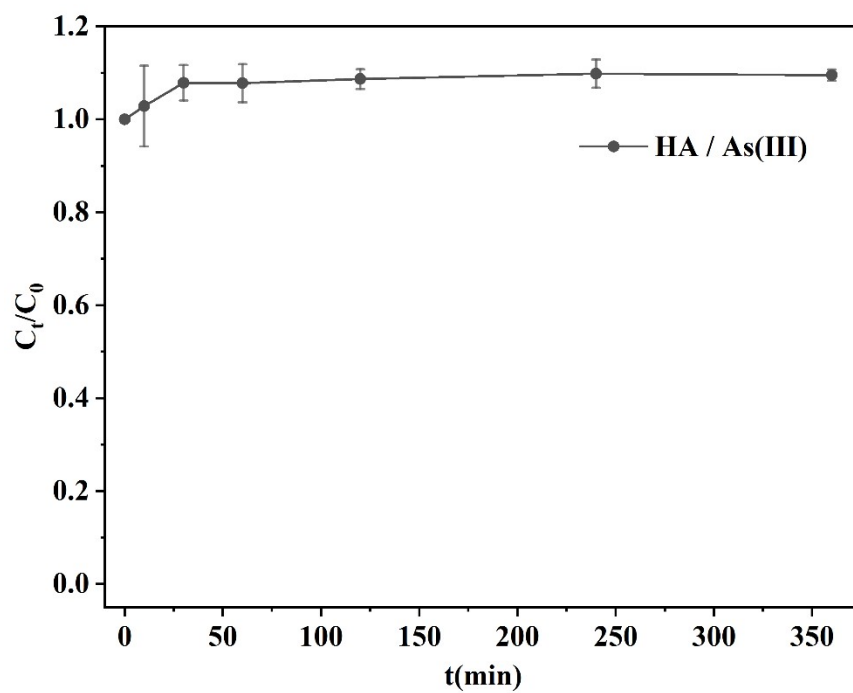

**Fig. S19.** As(III) concentration in the HA / As(III) system,  $C_{HA} = 100 \text{ mg L}^{-1}$ .

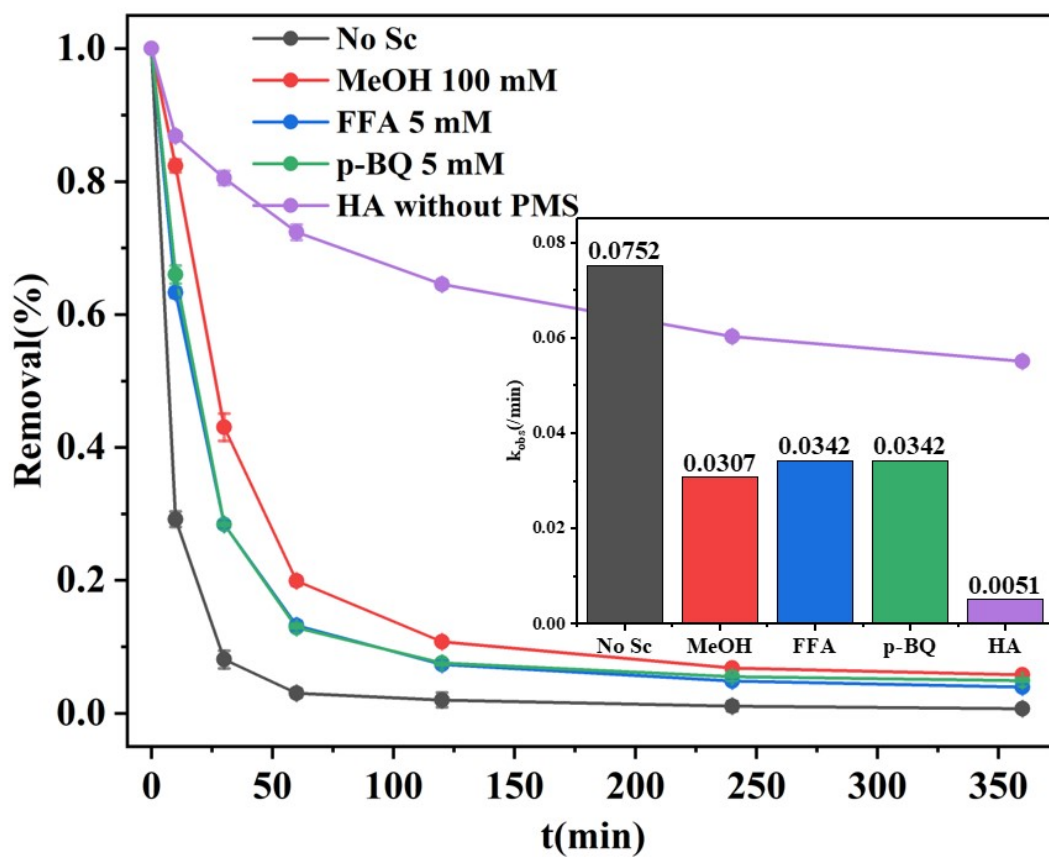

**Fig. S20.** Adsorption kinetics of As(III) by HA /  $Mn_1D_{40}UiO-66$  / PMS with different scavengers,  $Mn_1D_{40}UiO-66 = 0.2 \text{ g L}^{-1}$ ,  $C_{PMS} = 0.1 \text{ mM}$ ,  $C_{0(As)} = 1.1 \text{ mg L}^{-1}$ .

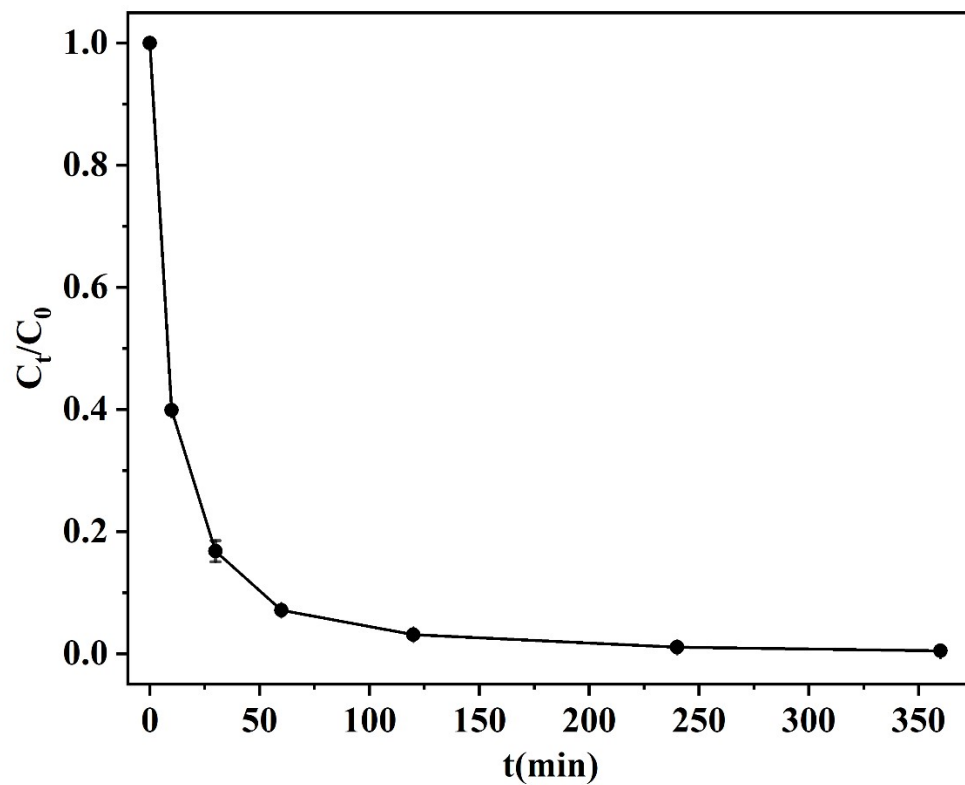

**Fig. S21.** As(III) removal in natural water samples,  $Mn_1D_{40}UiO-66 = 0.2 \text{ g L}^{-1}$ ,  $C_{PMS} = 0.1 \text{ mM}$ .

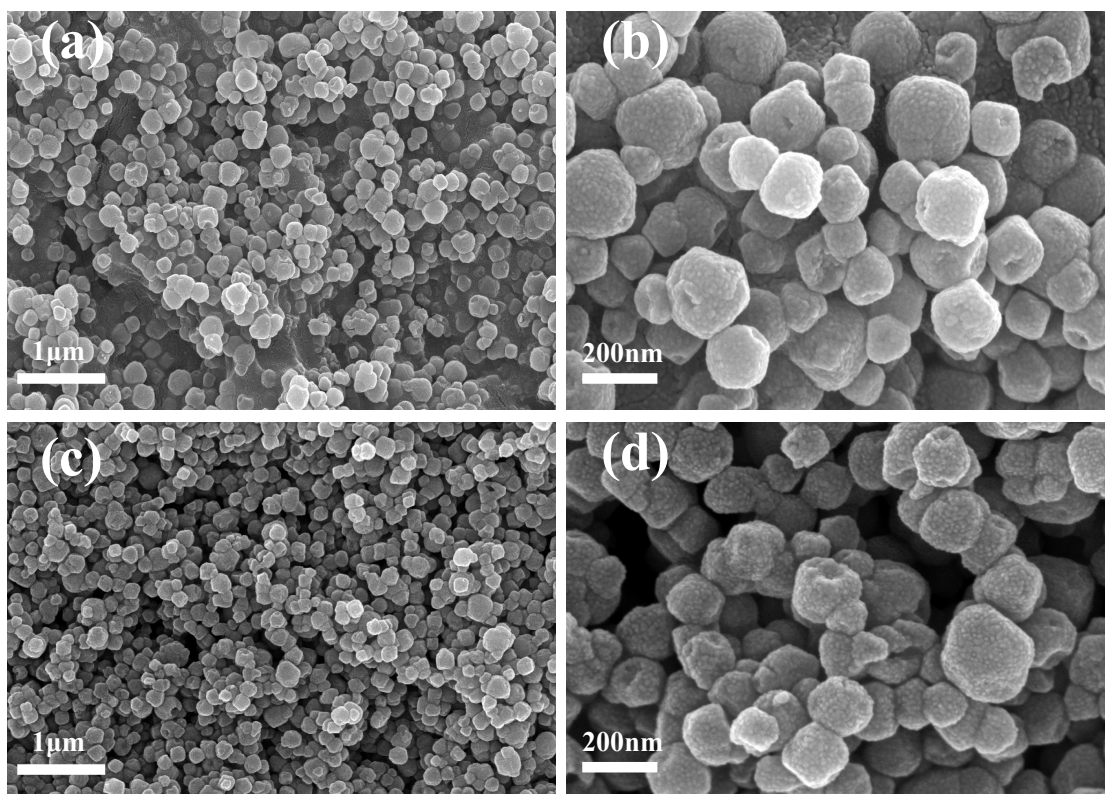

**Fig. S22.** SEM images of  $\text{Mn}_1\text{D}_{40}\text{UiO-66}$  before and after adsorption.

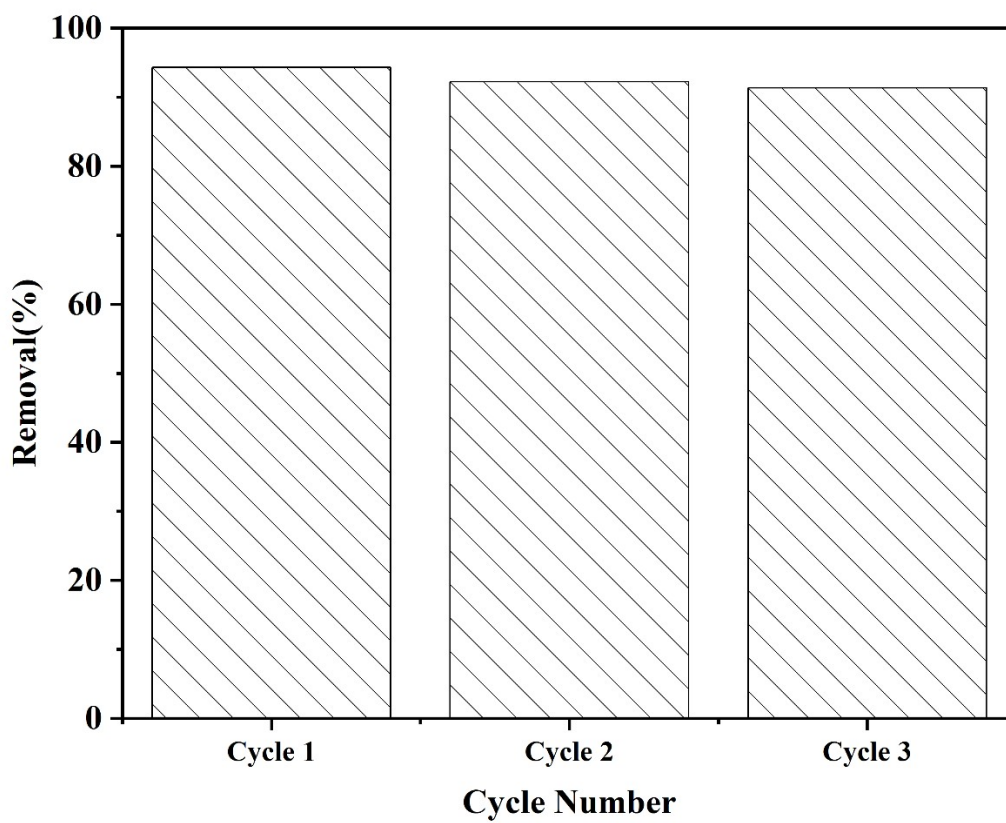

**Fig. S23.** Recycling of  $\text{Mn}_1\text{D}_{40}\text{UiO-66}$  / PMS for As(III) removal,  $\text{Mn}_1\text{D}_{40}\text{UiO-66} = 0.2 \text{ g L}^{-1}$ ,  $C_{\text{PMS}} = 0.1 \text{ mM}$ ,  $C_{0(\text{As})} = 1 \text{ mg L}^{-1}$ .
